# Supplementary material for: Degradation of ZnGa2O4:Cr3+ luminescent nanoparticles in lysosomal-like medium
Source: Royal Society of Chemistry journal article supplement (doi:10.1039/c9nr06867h), 2019-12-04
Supplement: c9nr06867h1.pdf [file c9nr06867h1.pdf]

Table S1: Summary of the batch's functionalization

Table S2: Compositions and pH Artificial Lysosomal Fluid (ALF).

Figure S1: STEM-EDX analysis of ZGOOH in ALF at (a) t0 and (b) d90. Table (c) represents mass percentage of each elements (mean and standard deviation, or stdv) obtained on different observations (n=10). Mass percentage of Cr has not been investigated because of its low initial concentration and the detection limits of the EDX detector.

Figure S2: Evolution of ion release rate of ZGOOH in (A) acetate buffer and (B) in milli-Q water, and ZGOPEG in (C) acetate buffer and (D) in milli-Q water. Quantification of release/degradation percentage, defined as the Ga, Zn or Cr mass in the aqueous media normalized to their respective mass in the initial NPs, was made by ICP-AES analysis

Figure S3: Comparison of the area population of ZGOPEG and ZGOOH in acetate buffer, (a) and (b) respectively, and in milli-Q Water (c) and (d) respectively, at t0 and d90. Kolmogorov-Smirnov statistical test has been used to determine the signification of the results (ns:  $p > 0.1$ , \*:  $p < 0.1$ , \*\*:  $p < 0.01$ , \*\*\*:  $p < 0.001$ , \*\*\*\*:  $p < 0.0001$ ).

Figure S1:

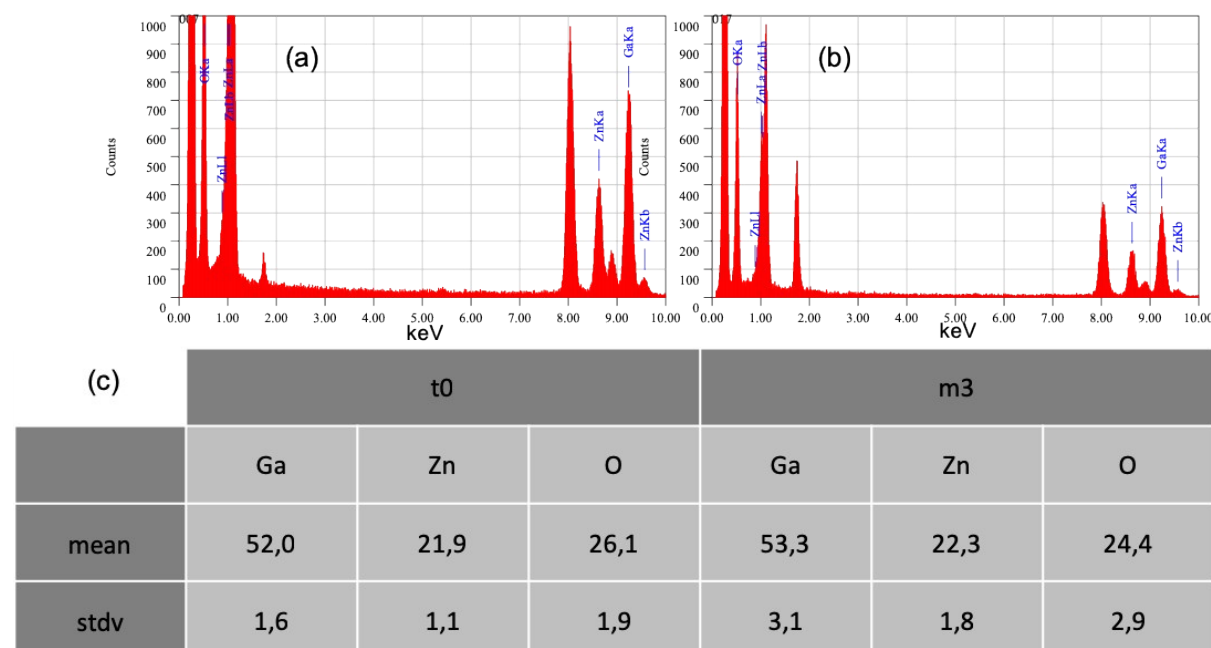

Figure S2:

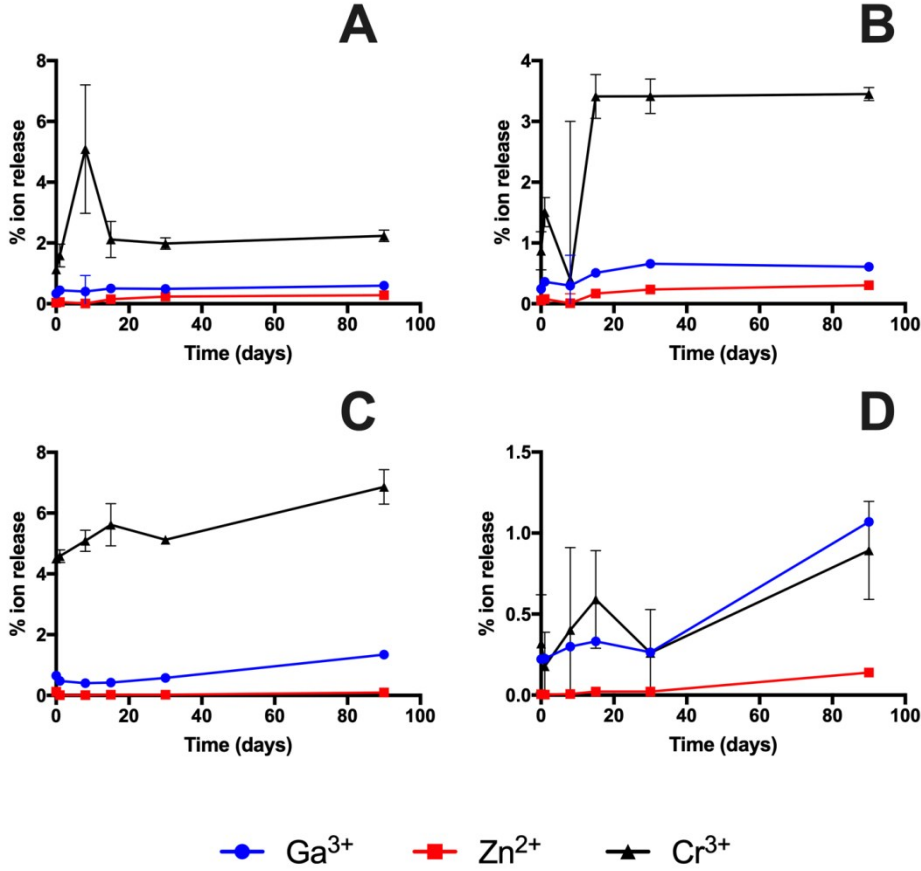

Figure S3:

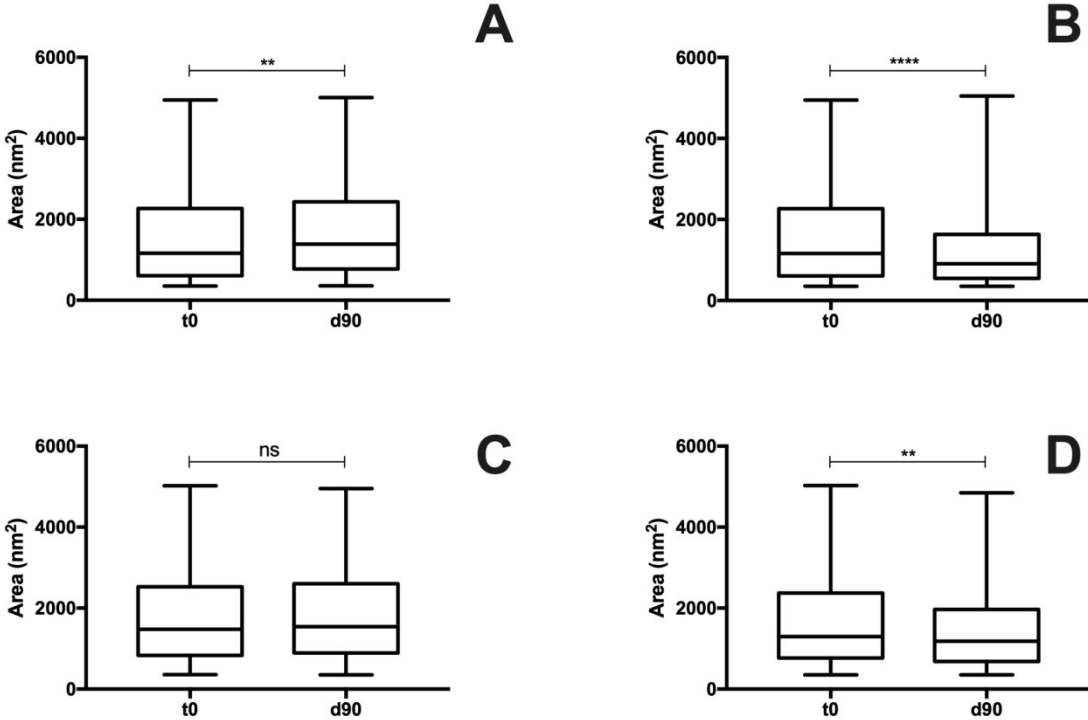

Table S1:

| Lot         | ZGOOH        |             |             |                      | ZGONH2        |             |              |                      | ZGOPEG        |             |              |                      |
|-------------|--------------|-------------|-------------|----------------------|---------------|-------------|--------------|----------------------|---------------|-------------|--------------|----------------------|
|             | HD (nm)      | pdl         | ZP (mv)     | conductivity (mS/cm) | HD (nm)       | pdl         | ZP (mv)      | conductivity (mS/cm) | HD (nm)       | pdl         | ZP (mv)      | conductivity (mS/cm) |
| 1           | 83,43±2,25   | 0,15        | -5,54       | 2,54                 | 173,97±4,18   | 0,1         | 27,1         | 2,85                 | 156±3,59      | 0,10        | -1,85        | 3,01                 |
| 2           | 100,08±2,67  | 0,2         | -2,55       | 2,83                 | 169,73±2,70   | 0,10        | 29           | 2,82                 | 129,87±4,74   | 0,09        | -2,45        | 3,02                 |
| 3           | 81,03±2,09   | 0,12        | 3,11        | 2,81                 | 159,87±3,31   | 0,08        | 23,2         | 2,84                 | 165,2±4,51    | 0,11        | -2,34        | 2,92                 |
| 4           | 79,87±2,38   | 0,12        | 4,14        | 2,85                 | 166±5,65      | 0,11        | 27,6         | 2,84                 | 143,87±2,52   | 0,07        | -1,97        | 3                    |
| 5           | 89,32±0,45   | 0,15        | 2,61        | 2,79                 | 174,1±1,90    | 0,15        | 31,3         | 2,81                 | 141,47±2,63   | 0,13        | -1,77        | 2,83                 |
| 6           | 82,94±1,22   | 0,12        | 4,49        | 2,81                 | 155,33±3,67   | 0,11        | 26           | 2,84                 | 129,10±2,95   | 0,13        | -4,66        | 3,15                 |
| 7           | 93,1±2,89    | 0,12        | -8,78       | 2,98                 | 143±2,29      | 0,09        | 17,7         | 2,8                  | 131,77±2,70   | 0,13        | -3,36        | 2,9                  |
| 8           | 86,63±2,47   | 0,10        | 4,53        | 2,8                  | 156,70±2,43   | 0,09        | 27           | 2,82                 | 194,27±1,46   | 0,16        | -1,88        | 2,83                 |
| 9           | 114,30±15,60 | 0,29        | 6,83        | 2,79                 | 177,90±1,18   | 0,10        | 30,8         | 2,75                 | 162,07±3,43   | 0,10        | -3,2         | 2,88                 |
| 10          | 91,45±7,79   | 0,18        | 11,2        | 2,8                  | 157,60±0,53   | 0,13        | 25,8         | 2,74                 | 128,40±1,66   | 0,10        | -3,19        | 2,83                 |
| 11          | 87,61±1,36   | 0,15        | 7,13        | 2,86                 | 172,90±2,52   | 0,11        | 22,7         | 2,76                 | 126,93±0,60   | 0,14        | -3,7         | 2,85                 |
| 12          | 89,92±5,08   | 0,19        | 7,6         | 2,79                 | 184,33±2,82   | 0,16        | 23,9         | 2,77                 | 143,87±0,91   | 0,11        | -3,65        | 2,87                 |
| 13          | 84,65±0,44   | 0,13        | -0,472      | 2,76                 | 186,43±1,32   | 0,12        | 29,4         | 2,75                 | 150,20±1,40   | 0,12        | -4,97        | 2,82                 |
| 14          | 88,78±3,60   | 0,16        | 13,3        | 2,76                 | 146,40±1,42   | 0,13        | 23,8         | 2,78                 | 111,73±1,37   | 0,14        | -3,36        | 2,78                 |
| 15          | 84,28±0,72   | 0,14        | 18,8        | 2,75                 | 217,30±0,79   | 0,17        | 28,7         | 2,77                 | 120,00±3,08   | 0,14        | -4,13        | 2,8                  |
| 16          | 86,68±0,41   | 0,13        | 15          | 3,22                 | 134,80±2,19   | 0,13        | 33,4         | 2,76                 | 120,33±2,50   | 0,17        | -3,75        | 2,84                 |
| 17          | 81,79±0,79   | 0,13        | 5,49        | 2,76                 | 169,50±1,93   | 0,12        | 31,4         | 2,74                 | 117,63±0,21   | 0,09        | -5,13        | 2,83                 |
| 18          | 83,16±0,35   | 0,11        | 5,85        | 2,74                 | 193,23±1,62   | 0,13        | 33,8         | 2,68                 | 127,93±0,64   | 0,09        | -4,22        | 2,84                 |
| 19          | 84,03±0,80   | 0,13        | 6,81        | 2,7                  | 180,90±3,05   | 0,18        | 27,5         | 2,67                 | 123,10±2,23   | 0,14        | -1,73        | 2,86                 |
| 20          | 92,97±5,62   | 0,22        | 13,1        | 2,68                 | 167,23±0,31   | 0,13        | 16           | 2,75                 | 114,17±1,40   | 0,10        | -3,78        | 2,84                 |
| <b>Mean</b> | <b>88,06</b> | <b>0,15</b> | <b>5,63</b> | <b>2,80</b>          | <b>169,47</b> | <b>0,12</b> | <b>26,81</b> | <b>2,78</b>          | <b>138,09</b> | <b>0,12</b> | <b>-3,25</b> | <b>2,89</b>          |
| <b>SD</b>   | <b>7,99</b>  | <b>0,04</b> | <b>6,78</b> | <b>0,13</b>          | <b>19,23</b>  | <b>0,03</b> | <b>4,67</b>  | <b>0,05</b>          | <b>20,42</b>  | <b>0,03</b> | <b>1,09</b>  | <b>0,09</b>          |

Table S2:

| Compositions                                                                   | Concentration (g/L) |
|--------------------------------------------------------------------------------|---------------------|
| MgCl <sub>2</sub>                                                              | 0.050               |
| NaCl                                                                           | 3.210               |
| Na <sub>2</sub> HPO <sub>4</sub>                                               | 0.071               |
| Na <sub>2</sub> SO <sub>4</sub>                                                | 0.039               |
| CaCl <sub>2</sub> 2H <sub>2</sub> O                                            | 0.128               |
| C <sub>6</sub> H <sub>5</sub> Na <sub>3</sub> O <sub>7</sub> 2H <sub>2</sub> O | 0.077               |
| NaOH                                                                           | 6.000               |
| C <sub>6</sub> H <sub>8</sub> O <sub>7</sub>                                   | 20.800              |
| H <sub>2</sub> NCH <sub>2</sub> COOH                                           | 0.059               |
| C <sub>4</sub> H <sub>4</sub> O <sub>6</sub> Na <sub>2</sub> 2H <sub>2</sub> O | 0.090               |
| C <sub>3</sub> H <sub>5</sub> NaO <sub>3</sub>                                 | 0.085               |
| C <sub>3</sub> H <sub>3</sub> O <sub>3</sub> Na                                | 0.086               |
| pH                                                                             | 4.5                 |
